# Supplementary material for: An Antiestrogenic Activity Score for tamoxifen and its metabolites is associated with breast cancer outcome
Source: Springer Nature journal article supplement (doi:10.1007/s10549-016-4083-6), 2016-12-22
Supplement: MOESM1 [file 11952974]

**Supplementary file 1.**

*
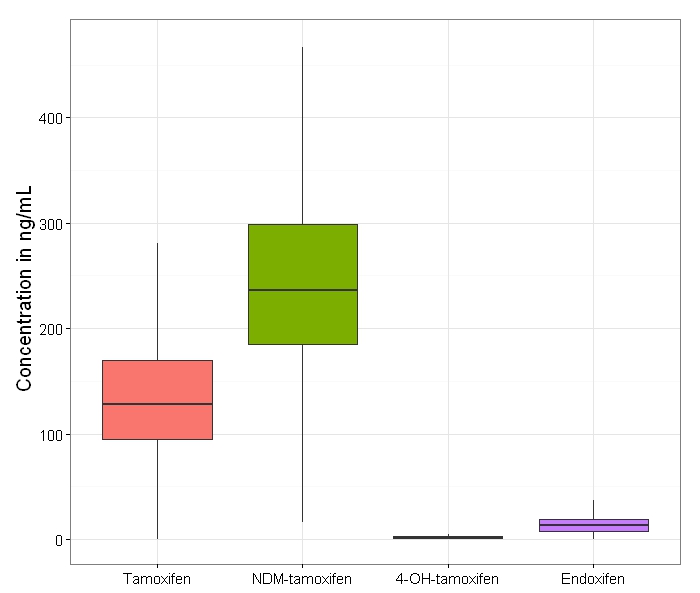
*

*Fig S1.1 Boxplots for serum concentrations of tamoxifen, N-desmethyltamoxifen, 4-hydroxytamoxifen and endoxifen in ng/mL. Concentration values greater than 1.5 times the upper value of the interquartile range are removed.*


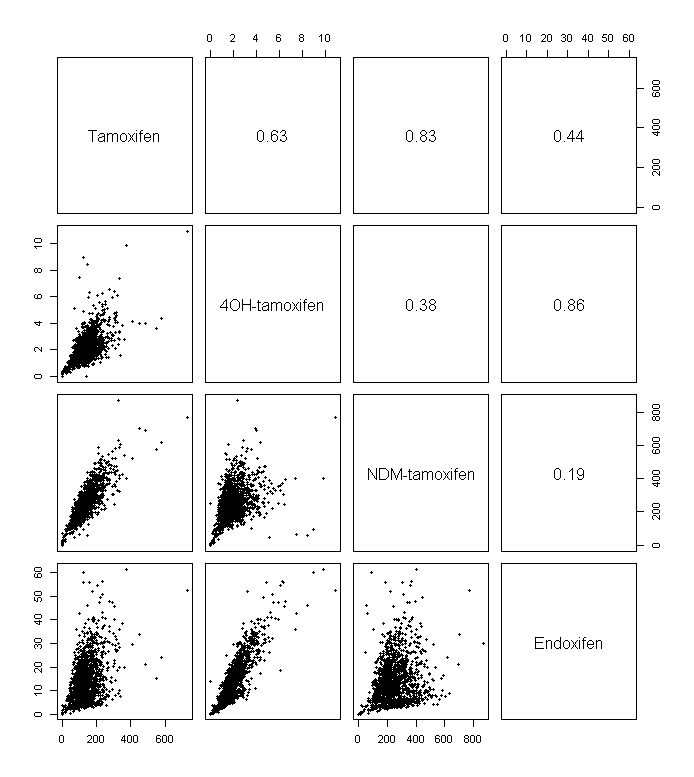


*Fig S1.2 Scatterplot, lower panel: concentrations of tamoxifen, 4-hydroxytamoxifen, N-desmethyltamoxifen and endoxifen in ng/mL; upper panel: correlations*
